# Supplementary material for: Early life exercise training and inhibition of apoLpp mRNA expression to improve age-related arrhythmias and prolong the average lifespan in Drosophila melanogaster
Source: publisher site journal article supplement (doi:10.18632/aging.204422), 2022-12-05
Supplement: Supplementary file [file aging-v14i24-204422-supplementary-material-SD1.pdf]

SUPPLEMENTARY FIGURE

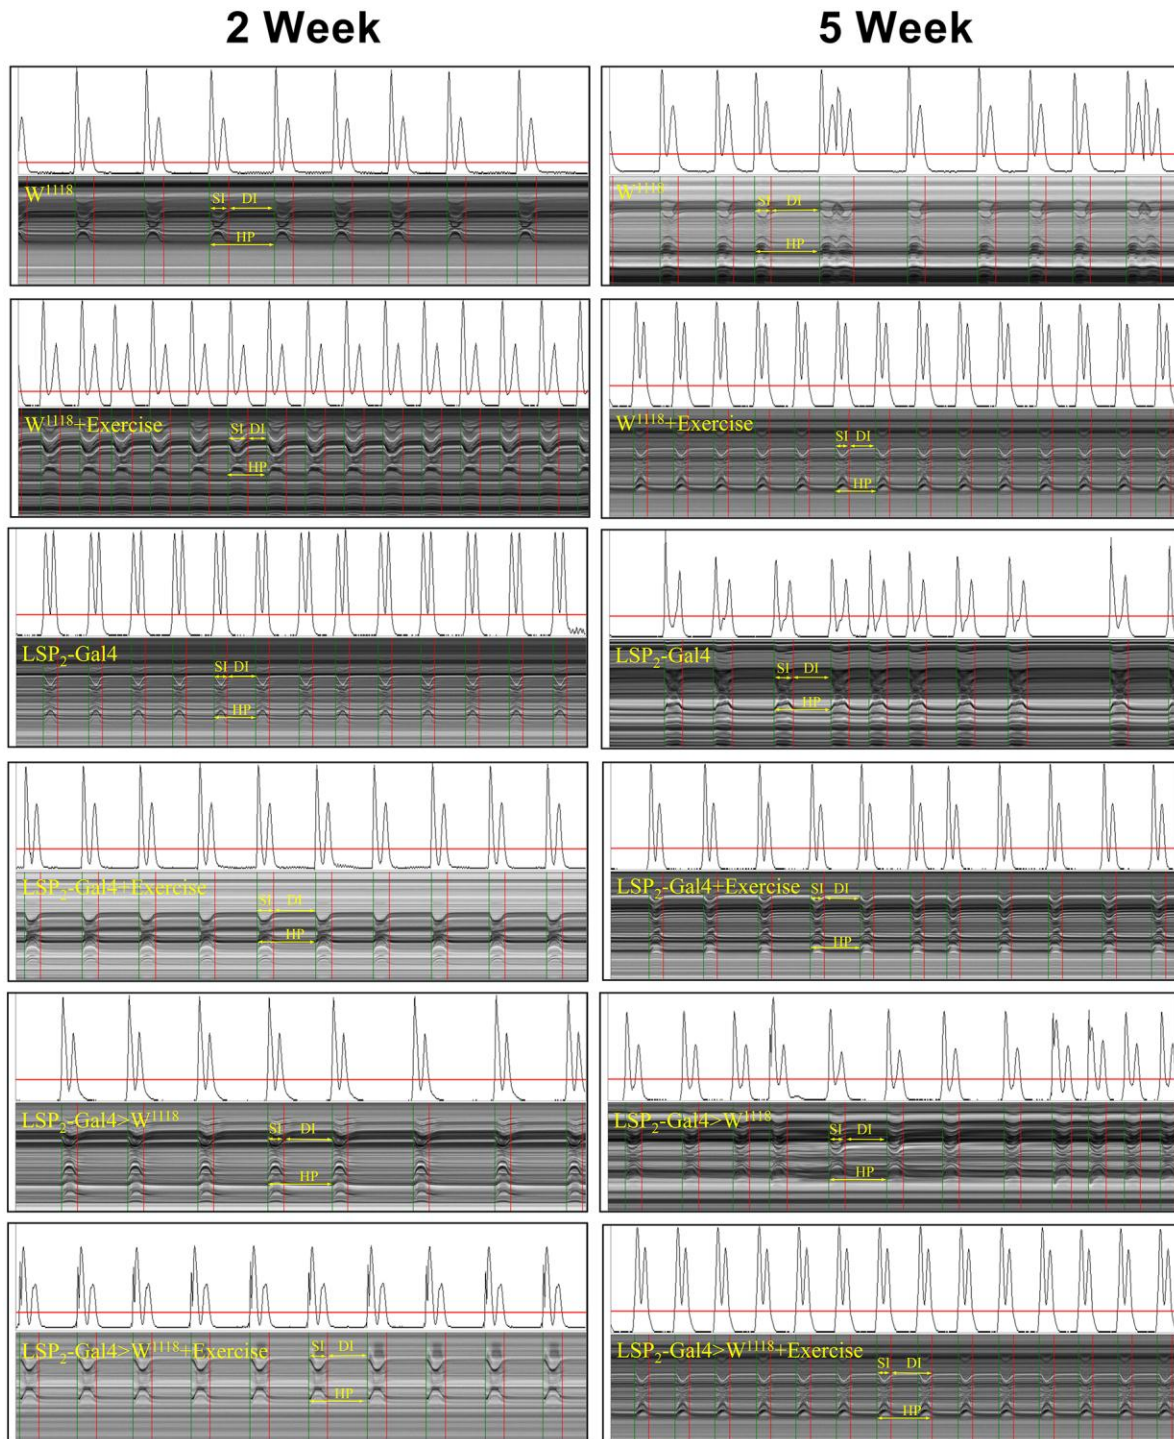

Supplementary Figure 1. M-mode traces (8 s) prepared from high-speed movies of intact flies of 14- and 35-days-old flies.
